# Supplementary material for: Characterization of Pseudomonas sp. En3, an Endophytic Bacterium from Poplar Leaf Endosphere with Plant Growth-Promoting Properties
Source: MDPI journal article supplement (doi:10.3390/f14112203), 2023-11-06
Supplement: s1 [file s1]

Archive with 1 entries (1 files):
- Supplementary material.pdf
