# Supplementary material for: Characterization of Pseudomonas sp. En3, an Endophytic Bacterium from Poplar Leaf Endosphere with Plant Growth-Promoting Properties
Source: MDPI journal article supplement (doi:10.3390/f14112203), 2023-11-06
Supplement: s1 [file s1 › Supplementary material.pdf]

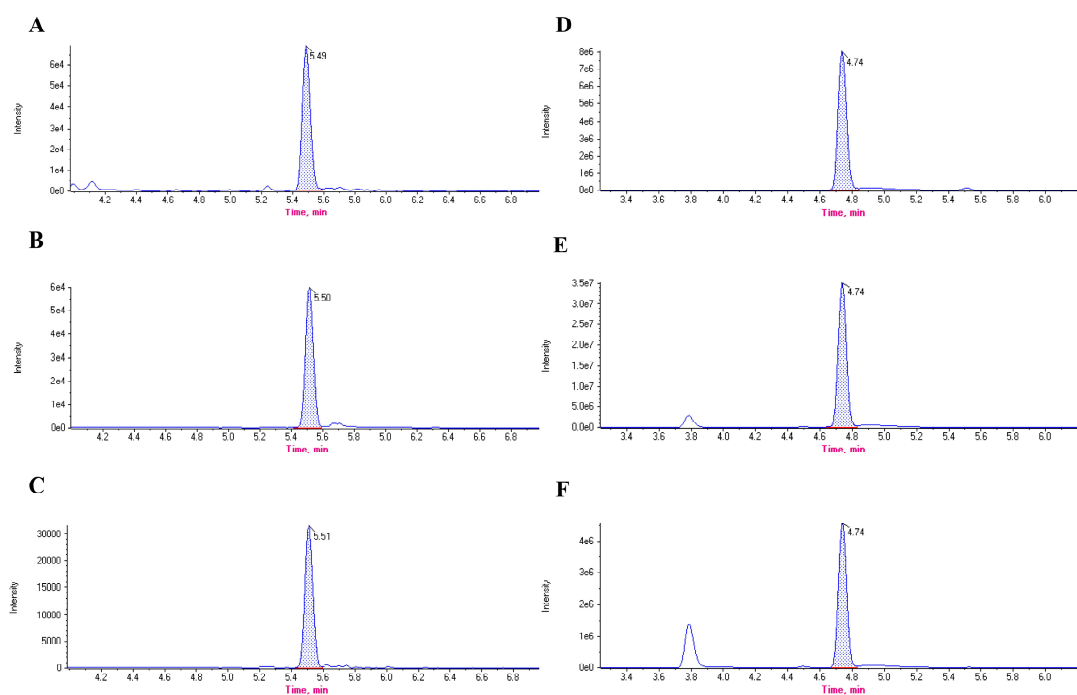

**Figure S1.** Mass spectra of IAA and IAM produced by En3 and DC3000. The spectra were obtained by HPLC-MS/MS. (A) Mass spectrum of the standard sample of IAA. (B) Mass spectrum of IAA produced by En3. (C) Mass spectrum of IAA produced by DC3000. (D) Mass spectrum of the standard sample of IAM. (E) Mass spectrum of IAM produced by En3. (F) Mass spectrum of IAM produced by DC3000.

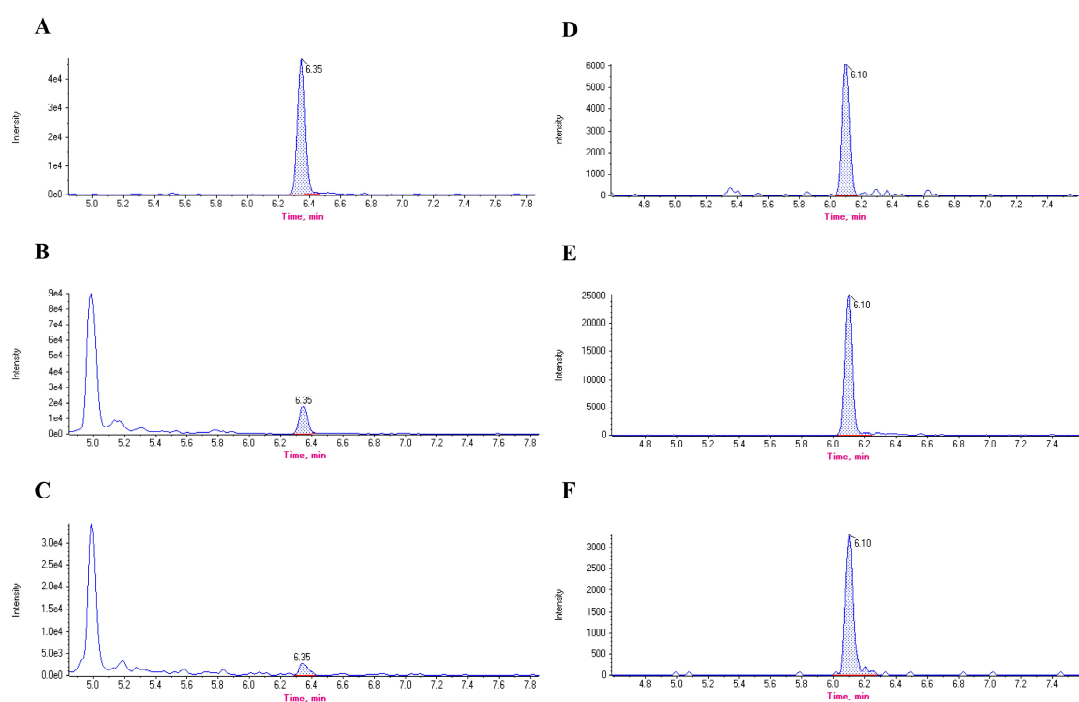

**Figure S2.** Mass spectrum of IAA synthesis intermediates produced by En3 and DC3000. The spectra were obtained by HPLC-MS/MS. (A) Mass spectrum of the standard sample of IAN. (B) Mass spectrum of IAN produced by En3. (C) Mass spectrum of IAN produced by DC3000. (D) Mass spectrum of the standard sample of IPyA. (E) Mass spectrum of IPyA produced by En3. (F) Mass spectrum of IPyA produced by DC3000.

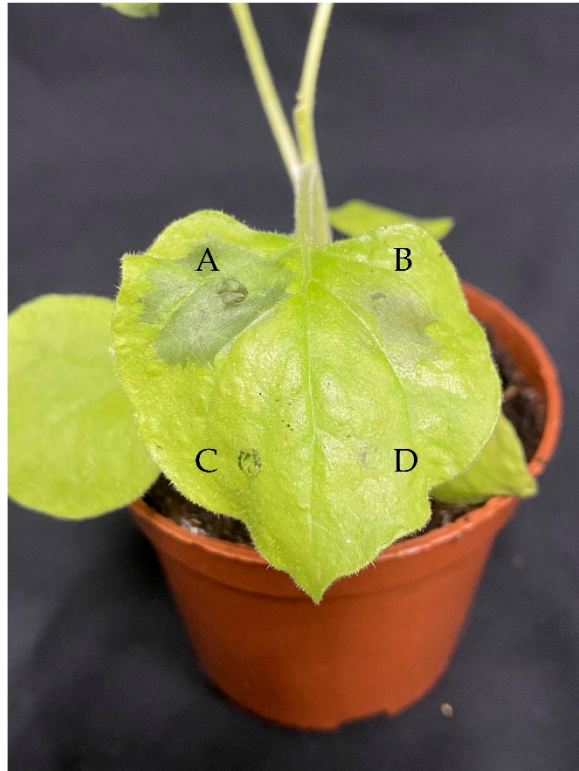

**Figure S3.** *N. benthamiana* leaves infiltrated with different concentrations of *P. syringae* pv. *tomato* DC3000 and *Pseudomonas* sp. En3. (A) The concentration of DC3000 was  $10^7$  cfu/mL. (B) The concentration of DC3000 was  $10^5$  cfu/mL. (C) The concentration of EN3 was  $10^7$  cfu/mL. (D) The concentration of EN3 was  $10^5$  cfu/mL. Photograph was taken on 2 dpi.

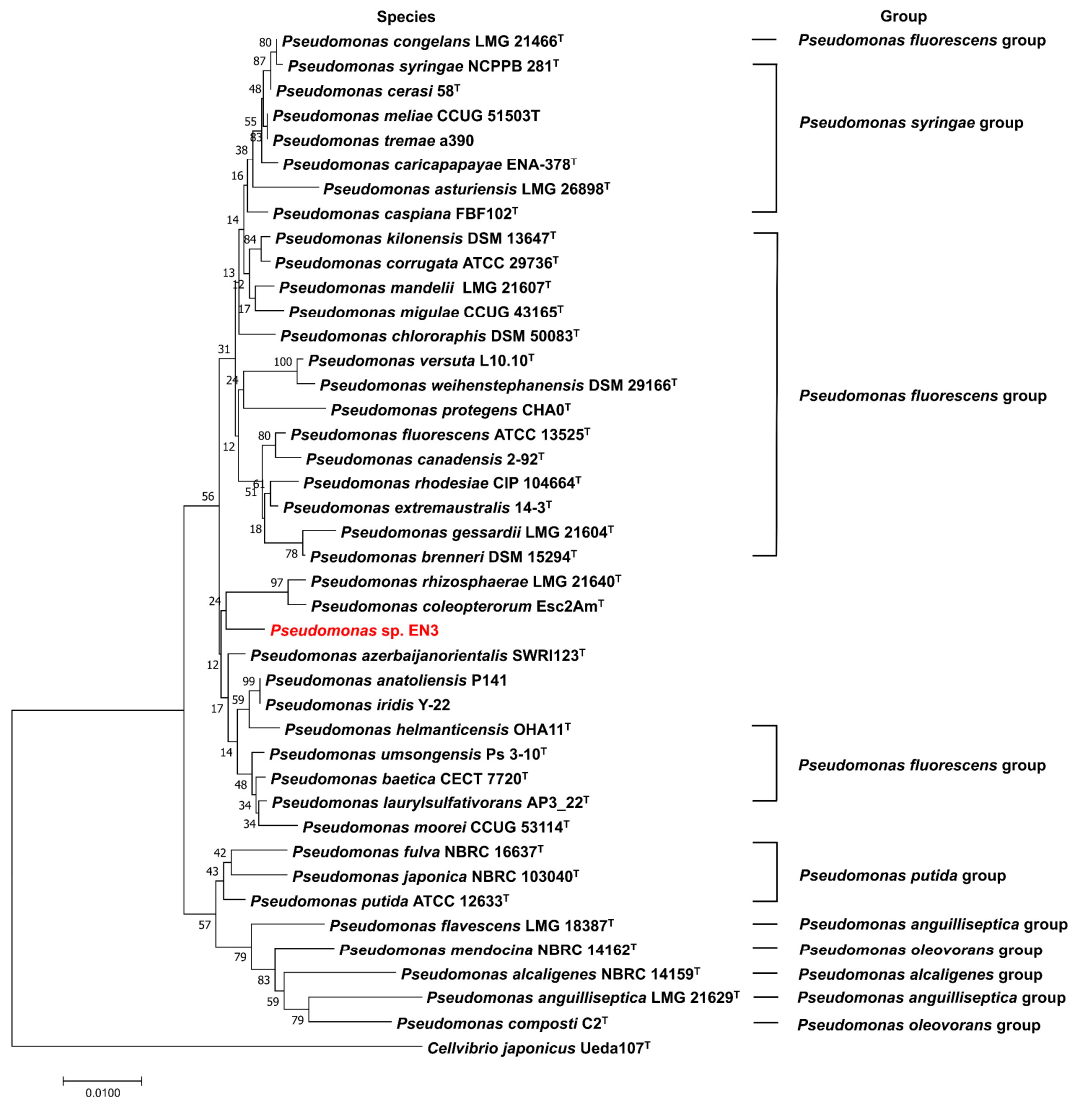

**Figure S4.** Neighbor-joining phylogenetic tree reconstruction based on 16S rRNA genes. Species, representative type strains from six *Pseudomonas* groups. Group, groups of *Pseudomonas*. Numbers at each node indicate the bootstrap percentage (n = 1,000). The superscript letter "T" indicates the type strain.

**Table S1.** Genes associated with colonization activity in *Pseudomonas* sp. En3 genome

| Colonization activity | Gene        | Gene annotation                             | Locus     |
|-----------------------|-------------|---------------------------------------------|-----------|
| Chemotaxis            | <i>cheY</i> | chemotaxis protein CheY                     | ctg_01821 |
|                       |             |                                             | ctg_02567 |
|                       | <i>cheZ</i> | chemotaxis protein CheZ                     | ctg_01822 |
|                       | <i>cheA</i> | chemotaxis family, sensor kinase CheA       | ctg_01823 |
|                       |             |                                             | ctg_02569 |
|                       | <i>cheB</i> | chemotaxis family, glutamate methylesterase | ctg_01824 |
|                       |             |                                             | ctg_02846 |
|                       |             |                                             | ctg_02574 |
|                       | <i>cheD</i> | chemotaxis protein CheD                     | ctg_02573 |
|                       | <i>cheW</i> | purine-binding chemotaxis protein CheW      | ctg_01828 |

---

|             |                                                     |           |
|-------------|-----------------------------------------------------|-----------|
|             |                                                     | ctg_01829 |
|             |                                                     | ctg_02960 |
|             |                                                     | ctg_02571 |
| <i>cheV</i> | chemotaxis protein CheV                             | ctg_01005 |
|             |                                                     | ctg_03128 |
|             |                                                     | ctg_01770 |
| <i>cheR</i> | chemotaxis protein methyltransferase CheR           | ctg_02847 |
|             |                                                     | ctg_02572 |
|             |                                                     | ctg_01771 |
| <i>motA</i> | chemotaxis protein MotA                             | ctg_01825 |
|             |                                                     | ctg_04713 |
| <i>motB</i> | chemotaxis protein MotB                             | ctg_01826 |
|             |                                                     | ctg_04712 |
| <i>wspA</i> | methyl-accepting chemotaxis protein WspA            | ctg_01114 |
| <i>wspB</i> | chemotaxis-related protein WspB                     | ctg_01115 |
| <i>wspC</i> | chemotaxis protein methyltransferase WspC           | ctg_01116 |
| <i>wspD</i> | chemotaxis-related protein WspD                     | ctg_01117 |
| <i>wspE</i> | sensor histidine kinase and response regulator WspE | ctg_01118 |
| <i>wspF</i> | chemotaxis family, response regulator WspF          | ctg_01119 |
| <i>wspR</i> | chemotaxis family, response regulator WspR          | ctg_01120 |
| <i>mcp</i>  | methyl-accepting chemotaxis protein                 | ctg_01849 |
|             |                                                     | ctg_01909 |
|             |                                                     | ctg_04033 |
|             |                                                     | ctg_00890 |
|             |                                                     | ctg_01016 |
|             |                                                     | ctg_01028 |
|             |                                                     | ctg_01031 |
|             |                                                     | ctg_04833 |
|             |                                                     | ctg_04775 |
|             |                                                     | ctg_03715 |
|             |                                                     | ctg_00530 |
|             |                                                     | ctg_00419 |
|             |                                                     | ctg_00418 |
|             |                                                     | ctg_00405 |
|             |                                                     | ctg_02081 |
|             |                                                     | ctg_00730 |
|             |                                                     | ctg_00729 |
|             |                                                     | ctg_02262 |
|             |                                                     | ctg_02037 |
|             |                                                     | ctg_03393 |
|             |                                                     | ctg_03294 |
|             |                                                     | ctg_03280 |

---

|           |             |                                                |           |
|-----------|-------------|------------------------------------------------|-----------|
|           |             |                                                | ctg_03030 |
|           |             |                                                | ctg_02961 |
|           |             |                                                | ctg_02570 |
|           |             |                                                | ctg_02566 |
|           |             |                                                | ctg_02382 |
|           |             |                                                | ctg_02332 |
|           |             |                                                | ctg_01300 |
|           |             |                                                | ctg_01656 |
|           |             |                                                | ctg_01679 |
| Secretion | <i>TssA</i> | type VI secretion system protein ImpA          | ctg_04499 |
| system    | <i>hcp</i>  | type VI secretion system secreted protein Hcp  | ctg_04498 |
|           | <i>TssM</i> | type VI secretion system protein ImpL          | ctg_04497 |
|           |             |                                                | ctg_04495 |
|           | <i>TssL</i> | type VI secretion system protein ImpK          | ctg_04494 |
|           | <i>TssK</i> | type VI secretion system protein ImpJ          | ctg_04493 |
|           | <i>TssJ</i> | type VI secretion system protein VasD          | ctg_04492 |
|           | <i>TssH</i> | type VI secretion system protein VasG          | ctg_04491 |
|           | <i>TssG</i> | type VI secretion system protein ImpH          | ctg_04490 |
|           | <i>TssF</i> | type VI secretion system protein ImpG          | ctg_04489 |
|           | <i>TssE</i> | type VI secretion system protein ImpF          | ctg_04488 |
|           | <i>TssC</i> | type VI secretion system protein ImpC          | ctg_04487 |
|           | <i>TssB</i> | type VI secretion system protein ImpB          | ctg_04486 |
|           | <i>vgrG</i> | type VI secretion system secreted protein VgrG | ctg_04483 |
|           | <i>hrpL</i> | type III secretion system protein hrpL         | ctg_02452 |
|           | <i>hrpJ</i> | type III secretion system protein hrpJ         | ctg_02451 |
|           | <i>hrcV</i> | type III secretion system protein hrcV         | ctg_02450 |
|           | <i>hrcN</i> | type III secretion system protein              | ctg_02448 |
|           | <i>hrpP</i> | type III secretion system protein              | ctg_02446 |
|           | <i>hrcR</i> | type III secretion system protein              | ctg_02444 |
|           | <i>hrcS</i> | type III secretion system protein              | ctg_02443 |
|           | <i>hrcT</i> | type III secretion system protein              | ctg_02442 |
|           | <i>hrcU</i> | type III secretion system protein              | ctg_02441 |
|           | <i>hrpV</i> | type III secretion system protein              | ctg_02435 |
|           | <i>HrpT</i> | type III secretion system protein              | ctg_02434 |
|           | <i>hrpG</i> | type III secretion system protein              | ctg_02432 |
|           | <i>hrpF</i> | type III secretion system protein              | ctg_02431 |
|           | <i>hrpD</i> | type III secretion system protein              | ctg_02429 |
|           | <i>hrcJ</i> | type III secretion system protein              | ctg_02428 |
|           | <i>hrpB</i> | type III secretion system protein              | ctg_02427 |
|           | <i>hrpZ</i> | type III secretion system protein              | ctg_02426 |
| Effector  | <i>avrE</i> | type III secretion system effector             | ctg_02440 |
|           | <i>CigR</i> | type III secretion system effector             | ctg_00188 |

---

*hopJ* type III secretion system effector

---

ctg\_00914
